# Supplementary material for: Impacts of Watershed Characteristics and Crop Rotations on Winter Cover Crop Nitrate-Nitrogen Uptake Capacity within Agricultural Watersheds in the Chesapeake Bay Region
Source: PubMed Central journal article supplement (PMC4924834; doi:10.1371/journal.pone.0157637), 2016-06-28
Supplement: pone.0157637.s003.pdf [file pone.0157637.s003.pdf]

**S1 Table. Soil properties and land use distribution of Tuckahoe Creek Watershed (TCW) and Greensboro Watershed (GW)**

| <b>Land use</b>                      | <b>TCW</b>              | <b>GW</b>               |
|--------------------------------------|-------------------------|-------------------------|
| Agriculture                          | 54.0 % [69.5% / 30.5 %] | 36.1 % [32.8% / 67.2 %] |
| Forest                               | 32.8 %                  | 48.3 %                  |
| Pasture                              | 8.4 %                   | 9.3 %                   |
| Urban                                | 4.2 %                   | 5.6 %                   |
| Water body                           | 0.6 %                   | 0.7 %                   |
| <b>Hydrologic soil groups (HSGs)</b> | <b>TCW</b>              | <b>GW</b>               |
| A                                    | 0.3 %                   | 3.1 %                   |
| B                                    | 55.8 %                  | 22.4 %                  |
| C                                    | 2.2 %                   | 4.2 %                   |
| D                                    | 41.7 %                  | 70.3 %                  |

Note: The values in the parenthesis [], denote the proportion of well-drained soils (HSG-A&B) and poorly-drained soils (HSG-C&D) used for agricultural lands, respectively. The explanation on the HSG is available in the caption of Fig. 2.
