# Supplementary material for: Impacts of Watershed Characteristics and Crop Rotations on Winter Cover Crop Nitrate-Nitrogen Uptake Capacity within Agricultural Watersheds in the Chesapeake Bay Region
Source: PubMed Central journal article supplement (PMC4924834; doi:10.1371/journal.pone.0157637), 2016-06-28
Supplement: pone.0157637.s004.pdf [file pone.0157637.s004.pdf]

**S2 Table. Representative crop rotation information and distribution of corn and soybean fields**

| Type | 2001           | 2002           | 2003           | 2004           | 2005           | 2006           | 2007           | 2008           | Proportion (%) |      |   |
|------|----------------|----------------|----------------|----------------|----------------|----------------|----------------|----------------|----------------|------|---|
|      |                |                |                |                |                |                |                |                | TCW            | GW   |   |
| AGA1 | Corn           | Dbl<br>WW/Soyb | Corn           | Dbl<br>WW/Soyb | Corn           | Dbl<br>WW/Soyb | Corn           | Dbl<br>WW/Soyb | 14.5           | 12.8 |   |
| AGA2 | Dbl<br>WW/Soyb | Corn           | Dbl<br>WW/Soyb | Corn           | Dbl<br>WW/Soyb | Corn           | Dbl<br>WW/Soyb | Corn           | 21.9           | 11.1 |   |
| AGAB | Corn           | Soyb           | Corn           | Dbl<br>WW/Soyb | Corn           | Soyb           | Corn           | Dbl<br>WW/Soyb | 7.7            | 11.6 |   |
| AGB1 | Corn           | Soyb           | Corn           | Soyb           | Corn           | Soyb           | Corn           | Soyb           | 11.3           | 17.5 |   |
| AGB2 | Soyb           | Corn           | Soyb           | Corn           | Soyb           | Corn           | Soyb           | Corn           | 9.8            | 10.8 |   |
| AGC1 | Corn           | Corn           | Corn           | Corn           | Corn           | Corn           | Corn           | Corn           | 17.1           | 10.8 |   |
| AGD1 | Soyb           | Corn           | Soyb           | Soyb           | Corn           | Soyb           | Soyb           | Corn           | 10.2           | 12.0 |   |
| AGD2 | Soyb           | Soyb           | Corn           | Soyb           | Soyb           | Corn           | Soyb           | Soyb           | 7.5            | 13.4 |   |
| TCW  | Corn (%)       | 50.6           | 59.0           | 58.1           | 48.8           | 60.8           | 56.3           | 50.6           | 59.0           | -    | - |
|      | Soyb (%)       | 49.4           | 41.0           | 41.9           | 51.2           | 39.2           | 43.7           | 49.4           | 41.0           | -    | - |
| GW   | Corn (%)       | 52.7           | 44.7           | 66.1           | 32.7           | 64.7           | 46.1           | 52.7           | 44.7           | -    | - |
|      | Soyb (%)       | 47.3           | 55.3           | 33.9           | 67.3           | 35.3           | 53.9           | 47.3           | 55.3           | -    | - |

Note: The last two columns indicate the relative area (%) of each crop rotation applied to croplands in TCW and GW. The bottom four rows indicates the relative area (%) of corn and soybean fields resulted from different rotations applied concurrently in TCW and GW. Dbl WW/Soyb is regarded as soybean fields and described in the caption of Fig 2.
