# Supplementary material for: Impacts of Watershed Characteristics and Crop Rotations on Winter Cover Crop Nitrate-Nitrogen Uptake Capacity within Agricultural Watersheds in the Chesapeake Bay Region
Source: PubMed Central journal article supplement (PMC4924834; doi:10.1371/journal.pone.0157637), 2016-06-28
Supplement: pone.0157637.s005.pdf [file pone.0157637.s005.pdf]

**S3 Table. Analysis of variance for the reduction of annual NO<sub>3</sub>-N loads by watershed, WCC planting species, and WCC planting timing**

| <b>Source of Variation</b>            | <b>Sum Squares</b> | <b>Degree of freedom</b> | <b>Mean Square</b> | <b>F-Statistics</b> | <b><i>p</i>-Value</b> |
|---------------------------------------|--------------------|--------------------------|--------------------|---------------------|-----------------------|
| <b>Watershed (Wshd)</b>               | 287.939            | 1                        | 287.939            | 438.43              | <b>0</b>              |
| <b>WCC Planting Species (Species)</b> | 4.576              | 2                        | 2.288              | 3.48                | <b>0.036</b>          |
| <b>WCC Planting Timing (Timing)</b>   | 4.228              | 1                        | 4.228              | 6.44                | <b>0.0133</b>         |
| <b>Wshd × Species</b>                 | 2.019              | 2                        | 1.01               | 1.54                | 0.2219                |
| <b>Wshd × Timing</b>                  | 1.52               | 1                        | 1.52               | 2.31                | 0.1326                |
| <b>Species × Timing</b>               | 0.212              | 2                        | 0.106              | 0.16                | 0.8513                |
| <b>Wshd × Species × Timing</b>        | 0.082              | 2                        | 0.041              | 0.06                | 0.9397                |
| <b>Error</b>                          | 47.286             | 72                       | 0.657              |                     |                       |
| <b>Total</b>                          | 347.862            | 83                       |                    |                     |                       |
