# Supplementary material for: Impacts of Watershed Characteristics and Crop Rotations on Winter Cover Crop Nitrate-Nitrogen Uptake Capacity within Agricultural Watersheds in the Chesapeake Bay Region
Source: PubMed Central journal article supplement (PMC4924834; doi:10.1371/journal.pone.0157637), 2016-06-28
Supplement: pone.0157637.s006.pdf [file pone.0157637.s006.pdf]

**S4 Table. The reduction amount and rate of water and NO<sub>3</sub>-N fluxes by winter cover crops**

| Watershed | Scenario             | Water fluxes, mm·ha <sup>-1</sup> ·10 <sup>4</sup> (%) |            |              |              | NO <sub>3</sub> -N fluxes, kg N·ha <sup>-1</sup> (%) |            |            |             |
|-----------|----------------------|--------------------------------------------------------|------------|--------------|--------------|------------------------------------------------------|------------|------------|-------------|
|           |                      | SURQ                                                   | LATQ       | GWQ          | PERC         | NSURQ                                                | NLATQ      | NGWQ       | LEA         |
| TCW       | Early-planted wheat  | 0.72 (2.3)                                             | 0.37 (4.4) | 7.23 (4.9)   | 13.34 (6)    | 0.2 (21.7)                                           | 0.2 (63.1) | 4.4 (56)   | 13.2 (67.5) |
|           | Early-planted barley | 0.98 (3.2)                                             | 0.52 (6.2) | 10.21 (7)    | 19.01 (8.6)  | 0.2 (23.8)                                           | 0.2 (70.5) | 4.8 (60.6) | 14.6 (74.8) |
|           | Early-planted rye    | 1.56 (5)                                               | 0.83 (9.9) | 17.22 (11.7) | 31.04 (14.1) | 0.2 (25.8)                                           | 0.2 (73.8) | 5.1 (65.1) | 15.7 (80.5) |
|           | Late-planted wheat   | 0.31 (1)                                               | 0.11 (1.3) | 1.2 (0.8)    | 4.01 (1.8)   | 0.1 (16.6)                                           | 0.1 (50.3) | 3.2 (41)   | 9.5 (48.9)  |
|           | Late-planted barley  | 0.42 (1.3)                                             | 0.19 (2.2) | 2.69 (1.8)   | 6.86 (3.1)   | 0.1 (19.9)                                           | 0.2 (58.7) | 3.7 (47.2) | 11.4 (58.4) |
|           | Late-planted rye     | 0.88 (2.8)                                             | 0.47 (5.6) | 8.23 (5.6)   | 17.25 (7.8)  | 0.2 (24.3)                                           | 0.2 (67.7) | 4.4 (55.5) | 13.7 (70.3) |
| GW        | Early-planted wheat  | 4.4 (2.4)                                              | 0.2 (4.5)  | 7 (12.6)     | 10.5 (14.7)  | 1.3 (48.9)                                           | 0.1 (64)   | 1.3 (71.4) | 4.9 (74.9)  |
|           | Early-planted barley | 6 (3.3)                                                | 0.2 (6.2)  | 8.9 (16)     | 13.9 (19.4)  | 1.4 (53.5)                                           | 0.1 (71.4) | 1.4 (78.3) | 5.4 (82.4)  |
|           | Early-planted rye    | 9.3 (5.1)                                              | 0.3 (8.6)  | 12.8 (23.1)  | 19.8 (27.7)  | 1.4 (55.9)                                           | 0.1 (72.6) | 1.5 (81.4) | 5.6 (86.1)  |
|           | Late-planted wheat   | 1.1 (0.6)                                              | 0 (1.2)    | 0.6 (1.1)    | 2.2 (3.1)    | 1 (38.2)                                             | 0.1 (53.1) | 0.9 (46.9) | 3.3 (50.1)  |
|           | Late-planted barley  | 1.8 (1)                                                | 0.1 (2.2)  | 1.7 (3)      | 4.1 (5.8)    | 1.1 (44.1)                                           | 0.1 (60.5) | 1 (55.6)   | 3.9 (59.9)  |
|           | Late-planted rye     | 4 (2.2)                                                | 0.2 (5.5)  | 5.4 (9.8)    | 10.4 (14.6)  | 1.3 (51.6)                                           | 0.1 (68.3) | 1.2 (66.2) | 4.7 (71.8)  |

Note: The numeric values show the reduction amount and rate (%) of water (mm·ha<sup>-1</sup>·10<sup>4</sup>) and NO<sub>3</sub>-N fluxes (kg N·ha<sup>-1</sup>), relative to the baseline. Pairwise comparisons (with the Baseline) showed that all reduction amounts were statistically significant (one-sided *p*-value <0.05 from a paired t-test).
